# Supplementary material
Source: PubMed Central journal article supplement (PMC7009320)

## SUPPLEMENTAL MATERIAL

### SUPPLEMENTAL TABLES

**Supplemental Table 1: Hospital Treatments**

| Characteristic                                                              | IV Route    | IO Route    |
|-----------------------------------------------------------------------------|-------------|-------------|
| Targeted temperature management, n (%) [n= 1058, 258]                       | 789 (74.6%) | 187 (72.5%) |
| Placebo [n=323, 89]                                                         | 230 (71.2%) | 64 (71.9%)  |
| Lidocaine [n=370, 94]                                                       | 281 (75.9%) | 66 (70.2%)  |
| Amiodarone [n=365, 75]                                                      | 278 (76.2%) | 57 (76.0%)  |
| Coronary catheterization in first 24 hours, n (%) [n=1070, 259]*            | 615 (57.5%) | 139 (50.2%) |
| Placebo [n=328, 89]                                                         | 191 (58.2%) | 38 (42.7%)  |
| Lidocaine [n=215, 95]                                                       | 215 (57.8%) | 48 (50.5%)  |
| Amiodarone [n=370, 75]                                                      | 209 (56.5%) | 44 (58.7%)  |
| Percutaneous coronary intervention in first 24 hours , n (%) [n=1070, 259]† | 362 (33.8%) | 70 (27%)    |
| Placebo [n=328, 89]                                                         | 109 (33.2%) | 19 (21.3%)  |
| Lidocaine [n=372, 95]                                                       | 132 (35.5%) | 29 (30.5%)  |
| Amiodarone [n=370, 75]                                                      | 121 (32.7%) | 22 (29.3%)  |
| Implantable cardiovascular defibrillator, n (%) [n=1061, 256]               | 193 (18.2%) | 55 (21.5%)  |
| Placebo [n=325, 88]                                                         | 54 (16.6%)  | 25 (28.4%)  |
| Lidocaine [n=368, 93]                                                       | 68 (18.5%)  | 13 (14%)    |
| Amiodarone [n=368, 75]                                                      | 71 (19.3%)  | 17 (22.7%)  |
| Care limited or withdrawn, n (%) [n=1070, 259]                              | 312 (29.2%) | 80 (30.9%)  |
| Placebo [n=328, 89]                                                         | 86 (26.2%)  | 26 (29.2%)  |
| Lidocaine [n=372, 95]                                                       | 113 (30.4%) | 31 (32.6%)  |
| Amiodarone [n=370, 75]                                                      | 113 (30.5%) | 23 (30.7%)  |

Abbreviations: IO -intraosseous vascular access, IV -intravenous vascular access

The [n = ] in the gray rows of the table refers to the number of patients in the IV and IO groups, respectively, who survived to hospital admission and in whom data were available for the indicated measure.

\* p =0.04; † p= 0.03 for differences in coronary catheterization and percutaneous coronary intervention, respectively between IV and IO treatment groups

**Supplemental Table 2: Adverse events by drug and drug route in the study population**

|                                                                 | <b>IV Route</b>        | <b>IO Route</b>      |
|-----------------------------------------------------------------|------------------------|----------------------|
| <b>Thrombophlebitis within 24h, no./total no. (%)</b>           | <b>6/2358 (0.3%)</b>   | <b>0/661 (0%)</b>    |
| Placebo                                                         | 2/825 (0.2%)           | 0/229 (0%)           |
| Lidocaine                                                       | 3/771 (0.4%)           | 0/220 (0%)           |
| Amiodarone                                                      | 1/762 (0.1%)           | 0/212 (0%)           |
| <b>Anaphylaxis within 24h, no./total no. (%)</b>                | <b>0/2358 (0%)</b>     | <b>0/661 (0%)</b>    |
| Placebo                                                         | 0/825 (0%)             | 0/229 (0%)           |
| Lidocaine                                                       | 0/771 (0%)             | 0/220 (0%)           |
| Amiodarone                                                      | 0/762 (0%)             | 0/212 (0%)           |
| <b>Seizure activity within 24h, no./total no. (%)</b>           | <b>100/2358 (4.2%)</b> | <b>21/661 (3.2%)</b> |
| Placebo                                                         | 30/825 (3.6%)          | 9/229 (3.9%)         |
| Lidocaine                                                       | 44/771 (5.7%)          | 7/220 (3.2%)         |
| Amiodarone                                                      | 26/762 (3.4%)          | 5/212 (2.4%)         |
| <b>Cardiac pacing within 24h, no./total no. (%)</b>             | <b>84/2358 (3.6%)</b>  | <b>25/661 (3.8%)</b> |
| Placebo                                                         | 24/825 (2.9%)          | 5/229 (2.2%)         |
| Lidocaine                                                       | 25/771 (3.2%)          | 7/220 (3.2%)         |
| Amiodarone                                                      | 35/762 (4.6%)          | 13/212 (6.1%)        |
| <b>Intraosseous complication within 24h, no./total no. (%)*</b> | <b>0/2358 (0%)</b>     | <b>4/661 (0.6%)</b>  |
| Placebo                                                         | 0/825 (0%)             | 2/229 (0.9%)         |
| Lidocaine                                                       | 0/771 (0%)             | 0/220 (0%)           |
| Amiodarone                                                      | 0/762 (0%)             | 2/212 (0.9%)         |
| <b>Any Adverse Event within 24h, no./total no. (%)</b>          | <b>184/2358 (7.8%)</b> | <b>50/661 (7.6%)</b> |
| Placebo                                                         | 53/825 (6.4%)          | 16/229 (7%)          |
| Lidocaine                                                       | 70/771 (9.1%)          | 14/220 (6.4%)        |
| Amiodarone                                                      | 61/762 (8%)            | 20/212 (9.4%)        |

Abbreviations: h – hours, IO - intraosseous vascular access, IV - intravenous vascular access

\*  $p < 0.001$  for differences in IO-associated complications between IV and IO treatment groups; all other differences were not statistically significant.

## **SUPPLEMENTAL FIGURES**

**Supplemental Figure 1:** Proportion of patients at the 10 participating study sites in whom study drug was given by intravenous (IV) vs intraosseous (IO) route. The number of patients (n) enrolled at the respective sites (A-J), along with the proportion who received study drug IV or IO are depicted.

■ IV Access Site

■ IO Access Site

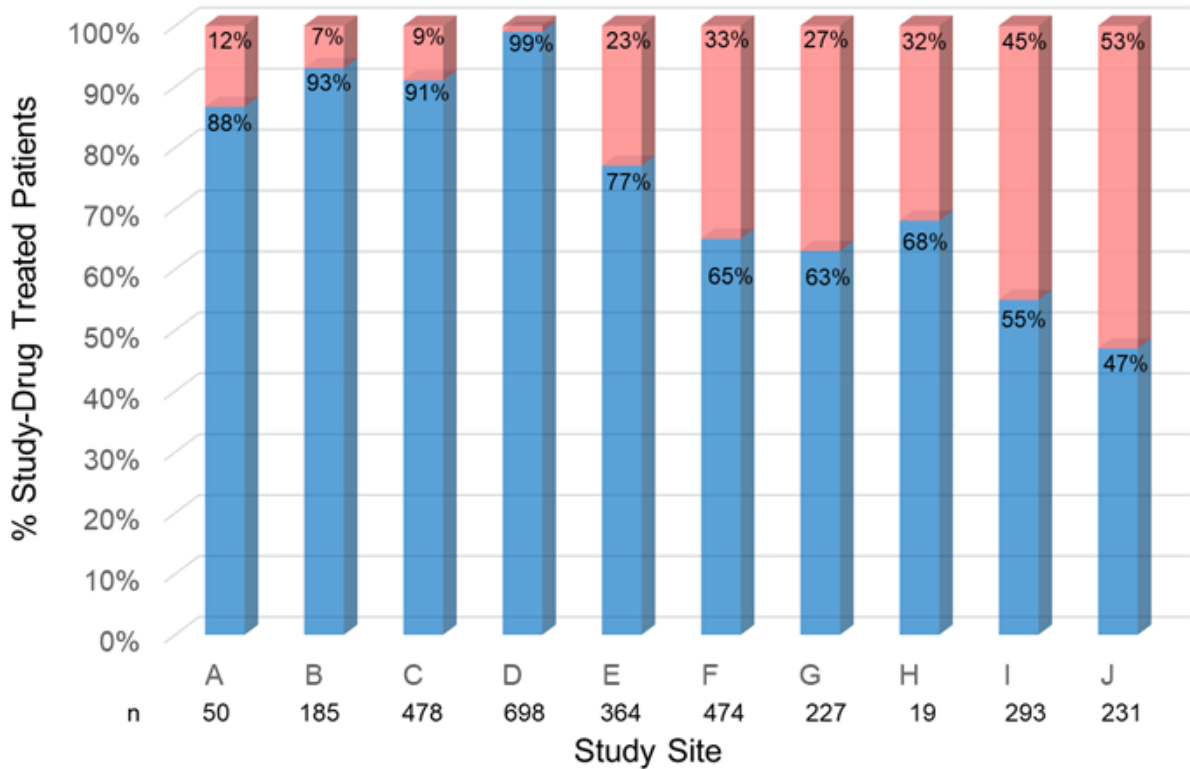

Supplement: NIHMS1549468-supplement-Supplemental_Publication_Material.pdf [file NIHMS1549468-supplement-Supplemental_Publication_Material.pdf]
